# Supplementary material
Source: MDPI journal article supplement (https://www.mdpi.com/2076-3417/13/11/6698)
Supplement: s1 [file s1]

**Table S1.** Physicochemical data of Temperature (T), Electrical Conductivity (EC), Salinity, pH, Dissolved Oxygen (DO) and nitrate-nitrogen as NO<sub>3</sub><sup>-</sup>-N, nitrite-nitrogen as NO<sub>2</sub><sup>-</sup>-N, Ammonium-Nitrogen as NH<sub>4</sub><sup>+</sup>-N, Dissolved Inorganic Nitrogen as DIN, Total Nitrogen as TN, Orthophosphate as PO<sub>4</sub>-P, Total Phosphorus as TP, *Escherichia Coli* as *E. coli* and Hellenic Water Quality Index as HWQI.

| a/a | Station Name | Date (M/D/Y) | Season | T (°C) | EC (μS/cm) | Salinity (ppt) | pH  | DO (mg/l) | NO <sub>2</sub> <sup>-</sup> -N (mg/l) | NO <sub>3</sub> <sup>-</sup> -N (mg/l) | NH <sub>4</sub> <sup>+</sup> -N (mg/l) | DIN (mg/l) | TN (mg/l) | PO <sub>4</sub> -P (mg/l) | TP (mg/l) | <i>E. coli</i> (cfu/100ml) | HWQI |
|-----|--------------|--------------|--------|--------|------------|----------------|-----|-----------|----------------------------------------|----------------------------------------|----------------------------------------|------------|-----------|---------------------------|-----------|----------------------------|------|
| 1   | K MD         | 5/6/2021     | SPRING | 17.8   | 991        | 0.4            | 8.9 | 9.4       | 0.04                                   | 5                                      | 0.13                                   | 5.17       | 5.8       | 0.41                      | 0.45      | 300                        | 1.12 |
| 2   | K 17         | 5/6/2021     | SPRING | 21     | 971        | 0.4            | 9.1 | 8.9       | 0.03                                   | 9.59                                   | 0.1                                    | 9.73       | 9.8       | 1.88                      | 1.92      | 370                        | 1.12 |
| 3   | K 12         | 5/6/2021     | SPRING | 21.7   | 928        | 0.4            | 9.6 | 11.6      | 0.05                                   | 8.55                                   | 0.1                                    | 8.71       | 9.9       | 0.83                      | 0.84      | 2700                       | 1.12 |
| 4   | K 5          | 5/6/2021     | SPRING | 20.4   | 880        | 0.4            | 9.2 | 9.2       | 0.61                                   | 4.15                                   | 7.65                                   | 12.41      | 12.7      | 0.83                      | 0.96      | 5400                       | 0.5  |
| 5   | K Ekv        | 5/6/2021     | SPRING | 18.8   | 1552       | 0.4            | 9.2 | 8.4       | 0.2                                    | 9.27                                   | 0.65                                   | 10.12      | 11.4      | 0.61                      | 0.64      | 26000                      | 0.5  |
| 6   | K MD         | 6/9/2021     | SUMMER | 19.1   | 992        | 0.5            | 8   | 7.6       | 0                                      | 5.71                                   | 0.02                                   | 5.73       | 6.1       | 0.46                      | 0.5       | 384                        | 2.19 |
| 7   | K 17         | 6/9/2021     | SUMMER | 22.9   | 1010       | 0.5            | 7.9 | 7.1       | 0.09                                   | 8.84                                   | 0.12                                   | 9.05       | 9.1       | 1.45                      | 1.51      | 428                        | 1.35 |
| 8   | K 12         | 6/9/2021     | SUMMER | 23.2   | 968        | 0.5            | 8.6 | 11.5      | 0.16                                   | 8.03                                   | 0.27                                   | 8.46       | 9.2       | 0.83                      | 0.89      | 4220                       | 1.35 |
| 9   | K 5          | 6/9/2021     | SUMMER | 21.9   | 482        | 0.2            | 8   | 7         | 0.61                                   | 1.65                                   | 8.13                                   | 10.39      | 10.42     | 0.83                      | 0.92      | 6400                       | 1.18 |
| 10  | K Ekv        | 6/9/2021     | SUMMER | 21.2   | 5882       | 3.2            | 7.7 | 5.4       | 0.32                                   | 8.54                                   | 0.53                                   | 9.39       | 9.6       | 0.7                       | 0.73      | 7760                       | 0.84 |
| 11  | K MD         | 7/7/2021     | SUMMER | 21.5   | 1037       | 0.5            | 7.4 | 7.9       | 0.01                                   | 4.1                                    | 0.02                                   | 4.13       | 4.4       | 0.6                       | 0.62      | 1860                       | 2.02 |
| 12  | K 17         | 7/7/2021     | SUMMER | 22.1   | 1057       | 0.5            | 7.6 | 8.5       | 0.09                                   | 6.2                                    | 0.18                                   | 6.48       | 6.7       | 0.89                      | 0.96      | 1560                       | 1.35 |
| 13  | K 12         | 7/7/2021     | SUMMER | 22.8   | 1020       | 0.5            | 7.8 | 9         | 0.08                                   | 8.9                                    | 0.04                                   | 9.02       | 9.1       | 0.95                      | 0.97      | 1620                       | 1.52 |
| 14  | K 5          | 7/7/2021     | SUMMER | 23.3   | 991        | 0.4            | 7.1 | 6.2       | 2.2                                    | 3.52                                   | 2.56                                   | 8.28       | 9.1       | 0.64                      | 0.66      | 4000                       | 0.84 |
| 15  | K Ekv        | 7/7/2021     | SUMMER | 23.8   | 8146       | 4.5            | 7.3 | 6.1       | 0.73                                   | 6.1                                    | 1.33                                   | 8.16       | 8.7       | 0.54                      | 0.55      | 18100                      | 0.84 |
| 16  | K MD         | 8/3/2021     | SUMMER | 21.8   | 1000       | 0.5            | 7.9 | 10.4      | 0.01                                   | 5.5                                    | 0.02                                   | 5.53       | 5.6       | 0.51                      | 0.52      | 330                        | 2.19 |
| 17  | K 17         | 8/3/2021     | SUMMER | 24     | 1014       | 0.5            | 8.1 | 9.6       | 0.07                                   | 5.5                                    | 0.09                                   | 5.66       | 6         | 0.86                      | 0.86      | 2820                       | 1.69 |
| 18  | K 12         | 8/3/2021     | SUMMER | 24     | 997        | 0.5            | 8.5 | 11.5      | 0.08                                   | 7.1                                    | 0.14                                   | 7.32       | 7.5       | 0.62                      | 0.65      | 1010                       | 1.52 |
| 19  | K 5          | 8/3/2021     | SUMMER | 23.6   | 873        | 0.4            | 7.6 | 6         | 1.11                                   | 3.3                                    | 5.18                                   | 9.59       | 10.2      | 0.86                      | 0.92      | 3120                       | 0.84 |
| 20  | K Ekv        | 8/3/2021     | SUMMER | 25     | 2596       | 1.3            | 7.5 | 3.6       | 0.23                                   | 7.2                                    | 0.77                                   | 8.2        | 8.8       | 0.42                      | 0.54      | 4580                       | 0.67 |
| 21  | K MD         | 9/9/2021     | AUTUMN | 19.3   | 1065       | 0.5            | 8.2 | 8.5       | 0.02                                   | 3.7                                    | 0.03                                   | 3.75       | 3.8       | 0.88                      | 0.89      | 400                        | 1.86 |
| 22  | K 17         | 9/9/2021     | AUTUMN | 21.8   | 1051       | 0.5            | 8.3 | 6.9       | 0.08                                   | 6.5                                    | 0.08                                   | 6.66       | 6.7       | 0.51                      | 0.52      | 14900                      | 1.35 |
| 23  | K 12         | 9/9/2021     | AUTUMN | 21.4   | 977        | 0.5            | 8.9 | 9.2       | 0.06                                   | 6.9                                    | 0.04                                   | 7          | 7         | 0.54                      | 0.54      | 54000                      | 1.86 |
| 24  | K 5          | 9/9/2021     | AUTUMN | 22.3   | 811        | 0.4            | 8.3 | 8         | 0.75                                   | 4.1                                    | 8.6                                    | 13.45      | 14.3      | 1.02                      | 1.07      | 48200                      | 1.01 |
| 25  | K Ekv        | 9/9/2021     | AUTUMN | 20.4   | 5434       | 2.9            | 8   | 6.5       | 0.11                                   | 5.3                                    | 0.47                                   | 5.88       | 7.3       | 0.22                      | 0.23      | 34400                      | 1.53 |
| 26  | K MD         | 10/7/2021    | AUTUMN | 17     | 1080       | 0.5            | 7.7 | 9.2       | 0.01                                   | 18.73                                  | 0.02                                   | 18.76      | 18.84     | 0.76                      | 0.79      | 100                        | 2.19 |
| 27  | K 17         | 10/7/2021    | AUTUMN | 19.6   | 1028       | 0.5            | 7.7 | 6.8       | 0.04                                   | 11.42                                  | 0.05                                   | 11.52      | 11.71     | 0.57                      | 0.62      | 4500                       | 1.69 |
| 28  | K 12         | 10/7/2021    | AUTUMN | 18.5   | 961        | 0.5            | 8   | 10.2      | 0.03                                   | 10.49                                  | 0.04                                   | 10.56      | 10.84     | 0.37                      | 0.4       | 500                        | 2.03 |
| 29  | K 5          | 10/7/2021    | AUTUMN | 19.8   | 921        | 0.5            | 7.6 | 2.3       | 0.11                                   | 0.24                                   | 15.23                                  | 15.58      | 16.42     | 1.62                      | 1.68      | 22700                      | 1.18 |

|    |       |           |        |      |        |     |     |      |      |       |      |       |       |      |      |        |      |
|----|-------|-----------|--------|------|--------|-----|-----|------|------|-------|------|-------|-------|------|------|--------|------|
| 30 | K Ekv | 10/7/2021 | AUTUMN | 18.6 | 5430   | 3   | 7.4 | 4.5  | 0.14 | 8.01  | 0.53 | 8.68  | 8.9   | 0.17 | 0.18 | 22200  | 1.36 |
| 31 | K MD  | 11/4/2021 | AUTUMN | 15.7 | 1160   | 0.6 | 8.1 | 10.4 | 0.07 | 13.47 | 0.01 | 13.56 | 13.74 | 0.55 | 0.57 | 100    | 1.85 |
| 32 | K 17  | 11/4/2021 | AUTUMN | 18.7 | 1106   | 0.6 | 8.1 | 6.9  | 0.16 | 9.98  | 0.27 | 10.4  | 10.69 | 0.33 | 0.37 | 49000  | 1.13 |
| 33 | K 12  | 11/4/2021 | AUTUMN | 18.2 | 1054   | 0.5 | 8.6 | 9.9  | 0.08 | 11.55 | 0.03 | 11.65 | 11.92 | 0.29 | 0.33 | 2200   | 2.03 |
| 34 | K 5   | 11/4/2021 | AUTUMN | 19.6 | 988    | 0.5 | 8.2 | 2.5  | 3.46 | 3.98  | 4.55 | 11.99 | 12.79 | 0.88 | 1.01 | 92000  | 0.67 |
| 35 | K Ekv | 11/4/2021 | AUTUMN | 17.7 | 3345   | 1.8 | 7.7 | 4.9  | 0.35 | 7.99  | 0.38 | 8.72  | 8.9   | 0.12 | 0.12 | 25000  | 2.03 |
| 36 | K MD  | 12/9/2021 | WINTER | 12.4 | 1143   | 0.6 | 8.2 | 9.7  | 0.05 | 4.16  | 0.26 | 4.47  | 4.5   | 0.49 | 0.49 | 200    | 1.52 |
| 37 | K 17  | 12/9/2021 | WINTER | 14.9 | 1117   | 0.6 | 8.2 | 9.3  | 0.04 | 4.76  | 0.19 | 4.99  | 5.2   | 0.86 | 0.87 | 300    | 1.69 |
| 38 | K 12  | 12/9/2021 | WINTER | 13.6 | 1100   | 0.6 | 8.2 | 10.3 | 0.04 | 7.36  | 0.08 | 7.48  | 7.52  | 0.11 | 0.11 | 600    | 2.71 |
| 39 | K 5   | 12/9/2021 | WINTER | 17   | 1067   | 0.5 | 8.5 | 8.6  | 0.48 | 8.83  | 5.16 | 14.47 | 16    | 0.73 | 0.73 | 3700   | 1.01 |
| 40 | K Ekv | 12/9/2021 | WINTER | 13.5 | 2145   | 1.1 | 8.2 | 9.7  | 0.09 | 6.9   | 0.69 | 7.68  | 8.3   | 0.2  | 0.21 | 700    | 1.69 |
| 41 | K MD  | 1/11/2022 | WINTER | 10   | 519    | 0.3 | 8.2 | 10.5 | 0.02 | 4.32  | 0.08 | 4.42  | 4.68  | 0.15 | 0.16 | 2700   | 2.71 |
| 42 | K 17  | 1/11/2022 | WINTER | 11.2 | 513    | 0.3 | 8.3 | 10.4 | 0.02 | 3.86  | 0.14 | 4.02  | 4.14  | 0.15 | 0.16 | 23000  | 2.71 |
| 43 | K 12  | 1/11/2022 | WINTER | 10.9 | 443.4  | 0.2 | 8.3 | 10.8 | 0.02 | 3.36  | 0.58 | 3.96  | 4.61  | 0.2  | 0.22 | 100000 | 1.87 |
| 44 | K 5   | 1/11/2022 | WINTER | 14.4 | 729    | 0.4 | 8.3 | 9.9  | 0.52 | 8.56  | 2.49 | 11.57 | 13.75 | 0.48 | 0.52 | 120000 | 1.18 |
| 45 | K Ekv | 1/11/2022 | WINTER | 10.5 | 286.3  | 0.1 | 8.2 | 10.8 | 0.03 | 1.68  | 0.14 | 1.85  | 2.21  | 0.12 | 0.14 | 31000  | 2.88 |
| 46 | K MD  | 2/4/2022  | WINTER | 9.4  | 1101   | 0.6 | 8.2 | 10.9 | 0.06 | 5.45  | 0.09 | 5.6   | 5.6   | 0.28 | 0.31 | 200    | 2.04 |
| 47 | K 17  | 2/4/2022  | WINTER | 10.4 | 909    | 0.5 | 8.3 | 10.8 | 0.07 | 4.5   | 0.24 | 4.81  | 5.16  | 0.26 | 0.3  | 680    | 1.7  |
| 48 | K 12  | 2/4/2022  | WINTER | 10.5 | 894    | 0.4 | 8.4 | 11.2 | 0.05 | 5.37  | 0.16 | 5.58  | 5.8   | 0.71 | 0.73 | 360    | 1.69 |
| 49 | K 5   | 2/4/2022  | WINTER | 13.4 | 901    | 0.5 | 8.2 | 9.6  | 0.33 | 9.56  | 4.52 | 14.41 | 16.42 | 0.59 | 0.62 | 1640   | 1.18 |
| 50 | K Ekv | 2/4/2022  | WINTER | 9.6  | 366    | 0.2 | 8.2 | 10.8 | 0.1  | 4.25  | 0.52 | 4.87  | 5.21  | 0.16 | 0.17 | 1820   | 1.86 |
| 51 | K MD  | 3/8/2022  | SPRING | 11.7 | 985.1  | 0.5 | 8.6 | 11.8 | 0.02 | 5.3   | 0.01 | 5.33  | 5.39  | 0.25 | 0.27 | 104    | 2.54 |
| 52 | K 17  | 3/8/2022  | SPRING | 14.2 | 941    | 0.5 | 8.4 | 10.6 | 0.05 | 5.03  | 0.05 | 5.13  | 5.41  | 0.38 | 0.42 | 98000  | 1.86 |
| 53 | K 12  | 3/8/2022  | SPRING | 13.7 | 1000.7 | 0.5 | 8.8 | 12.7 | 0.07 | 6.97  | 0.02 | 7.06  | 7.56  | 0.54 | 0.64 | 950    | 2.02 |
| 54 | K 5   | 3/8/2022  | SPRING | 16.2 | 964    | 0.5 | 8.5 | 15.1 | 0.92 | 7.26  | 5.54 | 13.72 | 14.84 | 0.72 | 0.78 | 7500   | 1.18 |
| 55 | K Ekv | 3/8/2022  | SPRING | 13.5 | 2532   | 1.3 | 8   | 9.2  | 0.24 | 7.08  | 0.66 | 7.98  | 8.16  | 0.22 | 0.24 | 18000  | 1.52 |
| 56 | K MD  | 4/7/2022  | SPRING | 14.5 | 1050   | 0.5 | 8   | 5.8  | 0.11 | 4.87  | 0.13 | 5.11  | 5.18  | 0.51 | 0.51 | 138    | 1.18 |
| 57 | K 17  | 4/7/2022  | SPRING | 15.6 | 973    | 0.5 | 8   | 5.6  | 0.09 | 8.84  | 0.21 | 9.14  | 9.2   | 1.15 | 1.15 | 12000  | 1.02 |
| 58 | K 12  | 4/7/2022  | SPRING | 15.7 | 907    | 0.5 | 8.5 | 6.1  | 0.13 | 8.74  | 0.13 | 9     | 9.07  | 0.59 | 0.61 | 8200   | 1.18 |
| 59 | K 5   | 4/7/2022  | SPRING | 17.3 | 949    | 0.5 | 8.2 | 6.3  | 1.24 | 8.43  | 4.74 | 14.41 | 16.21 | 0.78 | 0.79 | 6700   | 0.84 |
| 60 | K Ekv | 4/7/2022  | SPRING | 15.6 | 4122   | 2.2 | 7.8 | 3.9  | 0.39 | 8.78  | 0.38 | 9.55  | 9.58  | 0.58 | 0.58 | 12300  | 0.85 |
